# Supplementary material for: PERFECTED enhanced recovery pathway (PERFECT-ER) versus standard acute hospital care for people after hip fracture surgery who have cognitive impairment: a feasibility cluster randomised controlled trial
Source: HighWire-hosted journal article supplement (doi:10.1136/bmjopen-2021-055267), 2022-02-01
Supplement: bmjopen-2021-055267supp002_data_supplement.pdf [file bmjopen-2021-055267supp002_data_supplement.pdf]

**Supplementary Table 2.** Per-site cost of 3 months start-up and 15 months of input from PERFECT-ER SIL AND PIL

| <b>Per site</b>                                            |                  |                   |                   |
|------------------------------------------------------------|------------------|-------------------|-------------------|
| <b>SIL</b>                                                 | <b>% of year</b> | <b>Period FTE</b> | <b>Annual FTE</b> |
| Champion ERP 1st August to 31st October 2016               | 0.25             | 0.5               | 0.125             |
| First year: 1/11/2016 - 31/7/2017                          | 0.75             | 0.2               | 0.15              |
| Second year: 1/8/2017 - 31/1/2018                          | 0.5              | 0.2               | 0.1               |
| Total FTE @£70,017 per annum (2016-17 prices) <sup>a</sup> | <b>£26,594</b>   |                   |                   |
| <b>PPL</b>                                                 | <b>Hours</b>     |                   |                   |
| First year: 1 hour/week for 3 months                       | 13               |                   |                   |
| First year: 1 hour/month for 9 months                      | 9                |                   |                   |
| Second year: 1 hour/month for 6 months                     | 6                |                   |                   |
| Total hours PPL input                                      | 28               |                   |                   |
| Total hours @£106 per hour (2016-17 prices) <sup>b</sup>   | <b>£2,968</b>    |                   |                   |

<sup>a</sup>source: Schema 14: Hospital Nurses, AfC band 6<sup>25</sup>

<sup>b</sup>source: Schema 15. Hospital-based doctors, Medical Consultant<sup>25</sup>
