# Supplementary material for: PERFECTED enhanced recovery pathway (PERFECT-ER) versus standard acute hospital care for people after hip fracture surgery who have cognitive impairment: a feasibility cluster randomised controlled trial
Source: HighWire-hosted journal article supplement (doi:10.1136/bmjopen-2021-055267), 2022-02-01
Supplement: bmjopen-2021-055267supp003_data_supplement.pdf [file bmjopen-2021-055267supp003_data_supplement.pdf]

**Supplementary Table 3: Hospital baseline characteristics**

|                                              | Intervention |         |        | Control <sup>a,b</sup> |         |        |
|----------------------------------------------|--------------|---------|--------|------------------------|---------|--------|
|                                              | Median       | Max     | Min    | Median                 | Max     | Min    |
| Number of Beds on Ward                       | 27.0         | 41.0    | 15.0   | 28.0                   | 38.0    | 25.0   |
| Number of Bed Days on Ward in last 12 months | 9855.0       | 14965.0 | 5475.0 | 10220.0                | 13870.0 | 9038.0 |
| Occupied Bed Rate (%) in last 12 months      | 93.0         | 99.0    | 90.0   | 96.0                   | 100     | 93.0   |
| Number of Falls on Ward in last 12 months    | 42.0         | 82.0    | 25.0   | 60.0                   | 111.0   | 32.0   |
| Number of Deaths on Ward in last 12 months   | 30.0         | 66.0    | 7.0    | 34.0                   | 68.0    | 13.0   |
| Registered/Qualified Nurses                  | 22.0         | 27.5    | 16.2   | 19.8                   | 26.8    | 12.0   |
| Geriatricians                                | 1.0          | 2.6     | 0.5    | 1.0                    | 1.0     | 0.8    |
| Orthopaedic Surgeons                         | 0.3          | 1.0     | 0.0    | 1.5                    | 12.0    | 0.0    |
| Other Consultants                            | 0.0          | 0.4     | 0.0    | 0.0                    | 4.7     | 0.0    |
| Other Registrars                             | 0.5          | 1.0     | 0.0    | 1.0                    | 5.6     | 0.4    |
| Other Junior Doctors                         | 1.5          | 2.5     | 0.0    | 3.0                    | 3.0     | 1.0    |

a One hospital (Control) missing all data

b One hospital (Control) missing data for *Number of Falls on the Ward* in last 12 months.
