# Supplementary material for: PERFECTED enhanced recovery pathway (PERFECT-ER) versus standard acute hospital care for people after hip fracture surgery who have cognitive impairment: a feasibility cluster randomised controlled trial
Source: HighWire-hosted journal article supplement (doi:10.1136/bmjopen-2021-055267), 2022-02-01
Supplement: bmjopen-2021-055267supp004_data_supplement.pdf [file bmjopen-2021-055267supp004_data_supplement.pdf]

Supplementary Table 4: Available data for analysis

| Time point & outcome measure | Intervention (N = 132) | Control (N = 150)     |
|------------------------------|------------------------|-----------------------|
| <b>Baseline</b>              |                        |                       |
| HowRThey                     | 5 (3.8)                | 13 (8.7)              |
| HowRwe                       | 39 (29.5)              | 56 (37.3)             |
| EQ-5D – Patient              | 40 (30.3)              | 63 (42.0)             |
| EQ-5D – SI                   | 7 (5.3)                | 11 (7.3)              |
| EQ-5D – Proxy                | 6 (4.5)                | 14 (9.3)              |
| MMSE                         | 4 (3.0)                | 13 (8.7)              |
| BADLS                        | 5 (3.8)                | 9 (6.0)               |
| 4AT                          | 5 (3.8)                | 18 (12.0)             |
| CDR                          | 5 (3.8)                | 13 (8.7)              |
| <b>Discharge</b>             |                        |                       |
|                              | <b>Expected = 123</b>  | <b>Expected = 143</b> |
| HowRthey                     | 116 (94.3)             | 116 (81.1)            |
| HowRwe                       | 84 (68.3)              | 72 (50.3)             |
| 4AT                          | 116 (94.3)             | 103 (72.0)            |
| Length of Stay               | 121 (98.4)             | 142 (99.3)            |
| PERFECTER Score              | 122 (99.2)             | 141 (98.6)            |
| <b>1 Month</b>               |                        |                       |
|                              | <b>Expected = 108</b>  | <b>Expected = 122</b> |
| MMSE                         | 106 (98.1)             | 111 (91.0)            |
| BADLS                        | 104 (96.3)             | 112 (91.8)            |
| EQ-5D Patient                | 84 (77.8)              | 78 (63.9)             |
| EQ-5D SI                     | 106 (98.1)             | 110 (90.2)            |
| EQ-5D Proxy                  | 105 (97.2)             | 112 (91.8)            |
| HowRthey                     | 102 (94.4)             | 110 (90.2)            |
| <b>3 Months</b>              |                        |                       |
|                              | <b>Expected = 83</b>   | <b>Expected = 102</b> |
| MMSE                         | 81 (97.6)              | 97 (95.1)             |
| Timed Up & Go                | 44 (53.0)              | 50 (49.0)             |
| BADLS                        | 81 (97.6)              | 96 (94.1)             |
| HowRthey                     | 82 (98.8)              | 94 (92.2)             |
| EQ-5D Patient                | 61 (73.5)              | 69 (67.6)             |
| EQ-5D SI                     | 81 (97.6)              | 97 (95.1)             |
| EQ-5D Proxy                  | 82 (98.8)              | 98 (96.1)             |
| <b>6 Months</b>              |                        |                       |
|                              | <b>Expected = 64</b>   | <b>Expected = 80</b>  |
| MMSE                         | 63 (98.4)              | 72 (90.0)             |
| BADLS                        | 61 (95.3)              | 77 (96.3)             |
| HowRthey                     | 64 (100)               | 76 (95.0)             |
| EQ-5D Patient                | 36 (56.3)              | 43 (53.8)             |
| EQ-5D SI                     | 48 (75.0)              | 65 (81.3)             |
| EQ-5D Proxy                  | 44 (68.8)              | 65 (81.3)             |
| Global CDR                   | 64 (100)               | 66 (82.5)             |

a: Estimated as negative
