# Supplementary material for: PERFECTED enhanced recovery pathway (PERFECT-ER) versus standard acute hospital care for people after hip fracture surgery who have cognitive impairment: a feasibility cluster randomised controlled trial
Source: HighWire-hosted journal article supplement (doi:10.1136/bmjopen-2021-055267), 2022-02-01
Supplement: bmjopen-2021-055267supp005_data_supplement.pdf [file bmjopen-2021-055267supp005_data_supplement.pdf]

**Supplementary Table 5.** Per-site costs over the study period (1/11/2016 – 31/1/2018)

| <b>Site</b> | <b>Estimated total numbers of potentially affected patients<sup>a</sup></b> | <b>SIL cost per case on study ward</b> | <b>PPL cost per case on study ward</b> | <b>Total costs per potentially affected patient</b> |
|-------------|-----------------------------------------------------------------------------|----------------------------------------|----------------------------------------|-----------------------------------------------------|
| <b>01</b>   | 190                                                                         | £140                                   | £16                                    | £156                                                |
| <b>03</b>   | 205                                                                         | £130                                   | £14                                    | £144                                                |
| <b>06</b>   | 76                                                                          | £350                                   | £39                                    | £389                                                |
| <b>07</b>   | 61                                                                          | £436                                   | £49                                    | £485                                                |
| <b>10</b>   | 225                                                                         | £118                                   | £13                                    | £131                                                |

<sup>a</sup>Patients on study wards, 60 $\geq$ , with confusion (AMTS $\leq$ 8/4AT $\geq$ ), hip fracture, surgery for hip fracture, ward stay of  $\geq$  5 days.
