# Supplementary material for: PERFECTED enhanced recovery pathway (PERFECT-ER) versus standard acute hospital care for people after hip fracture surgery who have cognitive impairment: a feasibility cluster randomised controlled trial
Source: HighWire-hosted journal article supplement (doi:10.1136/bmjopen-2021-055267), 2022-02-01
Supplement: bmjopen-2021-055267supp006_data_supplement.pdf [file bmjopen-2021-055267supp006_data_supplement.pdf]

**Supplementary Table 6:** Mean costs (standard errors): Health & social care services for participant, unpaid carer (SI) costs, out-of-pocket costs, total health & social care and societal costs over prior three months, at baseline and one-, three-, and six-month follow-ups (£, 2016-17)

| Cost                                  | Intervention (n=132) |       |      | Control (n=150) |       |      | Intervention-control |             |
|---------------------------------------|----------------------|-------|------|-----------------|-------|------|----------------------|-------------|
|                                       | n                    | Mean  | SE   | n               | Mean  | SE   | Mean difference      | 95% CI      |
| <b>Baseline</b>                       |                      |       |      |                 |       |      |                      |             |
| Health & social care (HRE)            | 125                  | 3740  | 709  | 135             | 3196  | 691  | 544                  | -1697, 2784 |
| Health & social care (SIR)            | 123                  | 3458  | 653  | 130             | 3148  | 642  | 310                  | -1761, 2381 |
| Health & social care (SIR+)           | 125                  | 3544  | 663  | 135             | 3094  | 645  | 450                  | -1642, 2543 |
| Societal (HRE) <sup>f</sup>           | 95                   | 9661  | 949  | 100             | 9783  | 932  | -122                 | -3131, 2886 |
| Societal (SIR) <sup>f</sup>           | 93                   | 9249  | 946  | 97              | 9823  | 934  | -574                 | -3581, 2433 |
| Societal (SIR+) <sup>f</sup>          | 95                   | 9299  | 886  | 100             | 9635  | 867  | -336                 | -3140, 2469 |
| <b>1 month</b>                        |                      |       |      |                 |       |      |                      |             |
| Intervn.+Health & social care (HRE)   | 89                   | 12859 | 531  | 99              | 11636 | 509  | 1223                 | -441, 2886  |
| Intervn.+Health & social care (SIR)   | 89                   | 13890 | 980  | 95              | 11489 | 974  | 2401                 | -726, 5527  |
| Intervn.+Health & social care (SIR+)  | 89                   | 13894 | 945  | 99              | 11574 | 922  | 2320                 | -667, 5306  |
| Intervn.+Societal (HRE) <sup>f</sup>  | 75                   | 14191 | 526  | 80              | 13988 | 511  | 203                  | -1456, 1862 |
| Intervn.+Societal (SIR) <sup>f</sup>  | 75                   | 15032 | 1023 | 76              | 14123 | 1023 | 908                  | -2364, 4180 |
| Intervn.+Societal (SIR+) <sup>f</sup> | 75                   | 15036 | 1023 | 80              | 14141 | 1000 | 895                  | -2341, 4131 |
| <b>3 months</b>                       |                      |       |      |                 |       |      |                      |             |
| Intervn.+Health & social care (HRE)   | 75                   | 9193  | 1721 | 88              | 5946  | 1684 | 3247                 | -2200, 8695 |
| Intervn.+Health & social care (SIR)   | 75                   | 8315  | 1258 | 87              | 4310  | 1226 | 4004*                | 30, 7979    |
| Intervn.+Health & social care (SIR+)  | 75                   | 8325  | 1274 | 88              | 4621  | 1236 | 3704                 | -311, 7719  |
| Intervn.+Societal (HRE) <sup>f</sup>  | 64                   | 12794 | 1909 | 71              | 10748 | 1846 | 2047                 | -3961, 8054 |
| Intervn.+Societal (SIR) <sup>f</sup>  | 64                   | 11983 | 1341 | 70              | 8923  | 1297 | 3060                 | -1161, 7281 |
| Intervn.+Societal (SIR+) <sup>f</sup> | 64                   | 11995 | 1293 | 71              | 9243  | 1243 | 2752                 | -1305, 6808 |
| <b>6 months</b>                       |                      |       |      |                 |       |      |                      |             |
| Intervn.+Health & social care (HRE)   | 57                   | 6807  | 1402 | 64              | 5146  | 1413 | 1661                 | -2842, 6164 |
| Intervn.+Health & social care (SIR)   | 57                   | 6827  | 999  | 64              | 4308  | 965  | 2519                 | -624, 5661  |
| Intervn.+Health & social care (SIR+)  | 57                   | 6839  | 1004 | 64              | 4308  | 971  | 2531                 | -629, 5692  |
| Intervn.+Societal (HRE) <sup>f</sup>  | 52                   | 11511 | 1462 | 54              | 12478 | 1476 | -967                 | -5666, 3733 |
| Intervn.+Societal (SIR) <sup>f</sup>  | 52                   | 11514 | 1506 | 54              | 11483 | 1536 | 31                   | -4836, 4897 |
| Intervn.+Societal (SIR+) <sup>f</sup> | 52                   | 11528 | 1511 | 54              | 11483 | 1541 | 44                   | -4839, 4928 |

Note: NHS CC=NHS continuing care; HRE=health records extraction; SIR=Suitable Informant-reported; SIR+=corresponding hospital costs data from HRE used when costs were missing from the SIR dataset; Intervn.=Intervention costs

a Funded by NHS or Social Services

b Provided by NHS or Social Services

c expenditure by self or family on equipment purchases

d expenditure by self or family on travel to appointments

e unpaid carers' time in care and support to participant

f societal costs include: participant's health and social care costs; unpaid carers' time in care and support to participant; expenditure by self or family on travel to appointments, equipment purchases
