# Supplementary material for: PERFECTED enhanced recovery pathway (PERFECT-ER) versus standard acute hospital care for people after hip fracture surgery who have cognitive impairment: a feasibility cluster randomised controlled trial
Source: HighWire-hosted journal article supplement (doi:10.1136/bmjopen-2021-055267), 2022-02-01
Supplement: bmjopen-2021-055267supp007_data_supplement.pdf [file bmjopen-2021-055267supp007_data_supplement.pdf]

Supplementary Table 7. Mean six-month costs (excluding or including intervention costs) over the study period (£, 2016-16 prices). Sample: cases where total costs were available across follow-up assessments

| Costs                                 | Intervention |        |       | Control |        |       | Intervention - Control |                |
|---------------------------------------|--------------|--------|-------|---------|--------|-------|------------------------|----------------|
|                                       | n            | Mean   | SE    | n       | Mean   | SE    | Mean difference        | 95% CI         |
| Health & social care (HRE)            | 47           | 25 414 | 2 227 | 56      | 21 164 | 2 142 | 4 250                  | -2 739, 11 239 |
| Health & social care (SIR)            | 47           | 26 304 | 1 741 | 53      | 18 930 | 1 639 | 7 373*                 | 1 964, 12 782  |
| Health & social care (SIR+)           | 47           | 26 342 | 1 731 | 56      | 19 231 | 1 586 | 7 111*                 | 1 800, 12 422  |
| Societal (HRE) <sup>a</sup>           | 39           | 35 837 | 3 118 | 38      | 38 067 | 3 227 | -2 230                 | -12 578, 8 118 |
| Societal (SIR) <sup>a</sup>           | 39           | 36 478 | 3 104 | 36      | 35 104 | 3 325 | 1 374                  | -9 115, 118 63 |
| Societal (SIR+) <sup>a</sup>          | 39           | 36 524 | 3 235 | 38      | 35 067 | 3 358 | 1 456                  | -9 295, 12 208 |
| Intervn.+Health & social care (HRE)   | 47           | 25 677 | 2 251 | 56      | 21 164 | 2 172 | 4 513                  | -2 563, 11 588 |
| Intervn.+Health & social care (SIR)   | 47           | 26 567 | 1 744 | 53      | 18 930 | 1 642 | 7 636*                 | 2 217, 13 055  |
| Intervn.+Health & social care (SIR+)  | 47           | 26 605 | 1 734 | 56      | 19 231 | 1 589 | 7 374*                 | 2 053, 12 695  |
| Intervn.+Societal (HRE) <sup>a</sup>  | 39           | 36 080 | 3 142 | 38      | 38 067 | 3 253 | -1 987                 | -12 416, 8 442 |
| Intervn.+Societal (SIR) <sup>a</sup>  | 39           | 36 721 | 3 127 | 36      | 35 104 | 3 350 | 1 618                  | -8 951, 12 186 |
| Intervn.+Societal (SIR+) <sup>a</sup> | 39           | 36 767 | 3 256 | 38      | 35 067 | 3 381 | 1 700                  | -9 124, 12 523 |

Note: NHS CC=NHS continuing care; HRE=health records extraction; SIR=Suitable Informant-reported; SIR+= corresponding hospital costs data from HRE used when costs were missing from the SIR dataset; Intervn.=Intervention costs

\* p<0.05

a. societal costs include: participant's health and social care costs; unpaid carers' time in care and support to participant; expenditure by self or family on travel to appointments, equipment purchases
