# Supplementary material for: PERFECTED enhanced recovery pathway (PERFECT-ER) versus standard acute hospital care for people after hip fracture surgery who have cognitive impairment: a feasibility cluster randomised controlled trial
Source: HighWire-hosted journal article supplement (doi:10.1136/bmjopen-2021-055267), 2022-02-01
Supplement: bmjopen-2021-055267supp008_data_supplement.pdf [file bmjopen-2021-055267supp008_data_supplement.pdf]

Supplementary Table 8. Intra-class correlations of 6-month total health and social care and societal costs (£,2016-17) and QALY over 6 months. Sample: cases where costs or outcomes data were available at all study period time points

|                                                         | <b>Intervention<br/>(n=132)<br/>(N=5)</b> |          |             |                 | <b>Control<br/>(n=150)<br/>(N=6)</b> |          |             |                 |
|---------------------------------------------------------|-------------------------------------------|----------|-------------|-----------------|--------------------------------------|----------|-------------|-----------------|
|                                                         | <b>n</b>                                  | <b>N</b> | <b>Mean</b> | <b>95% CI</b>   | <b>n</b>                             | <b>N</b> | <b>Mean</b> | <b>95% CI</b>   |
| <b>Costs</b>                                            |                                           |          |             |                 |                                      |          |             |                 |
| Health & social care (HRE) <sup>d</sup>                 | 47                                        | 5        | -0.045      | -0.148 to 0.057 | 56                                   | 6        | 0.117       | -0.152 to 0.386 |
| Health & social care (SIR) <sup>d</sup>                 | 47                                        | 5        | -0.051      | -0.147 to 0.045 | 53                                   | 6        | 0.034       | -0.165 to 0.232 |
| Health & social care (SIR+) <sup>d</sup>                | 47                                        | 5        | -0.050      | -0.147 to 0.048 | 56                                   | 6        | 0.028       | -0.154 to 0.210 |
| Societal (HRE) <sup>g</sup>                             | 39                                        | 5        | -0.041      | -0.194 to 0.112 | 38                                   | 5        | 0.190       | -0.189 to 0.569 |
| Societal (SIR) <sup>g</sup>                             | 39                                        | 5        | -0.057      | -0.194 to 0.079 | 36                                   | 5        | 0.214       | -0.201 to 0.628 |
| Societal (SIR+) <sup>g</sup>                            | 39                                        | 5        | -0.055      | -0.194 to 0.084 | 38                                   | 5        | 0.240       | -0.169 to 0.649 |
| Intervention + Health & social care (HRE) <sup>d</sup>  | 47                                        | 5        | -0.039      | -0.149 to 0.071 | 56                                   | 6        | 0.117       | -0.152 to 0.386 |
| Intervention + Health & social care (SIR) <sup>d</sup>  | 47                                        | 5        | -0.044      | -0.148 to 0.059 | 53                                   | 6        | 0.033       | -0.165 to 0.232 |
| Intervention + Health & social care (SIR+) <sup>d</sup> | 47                                        | 5        | -0.043      | -0.148 to 0.061 | 56                                   | 6        | 0.028       | -0.154 to 0.210 |
| Intervention + Societal (HRE) <sup>g</sup>              | 39                                        | 5        | -0.033      | -0.195 to 0.128 | 38                                   | 5        | 0.190       | -0.189 to 0.569 |
| Intervention + Societal (SIR) <sup>g</sup>              | 39                                        | 5        | -0.049      | -0.194 to 0.096 | 36                                   | 5        | 0.214       | -0.201 to 0.628 |
| Intervention + Societal (SIR+) <sup>g</sup>             | 39                                        | 5        | -0.047      | -0.194 to 0.101 | 38                                   | 5        | 0.240       | -0.169 to 0.649 |
| <b>QALY</b>                                             |                                           |          |             |                 |                                      |          |             |                 |
| Participant 6-month QALY (EQ-5D-5L)                     | 30                                        | 5        | 0.268       | -0.173 to 0.710 | 31                                   | 4        | 0.263       | -0.236 to 0.762 |
| Participant 6-month QALY (EQ-5D-5L-Proxy)               | 42                                        | 5        | 0.068       | -0.181 to 0.316 | 62                                   | 6        | 0.110       | -0.136 to 0.355 |
| Participant 6-month QALY (DEMQOL-U)                     | 34                                        | 5        | 0.236       | -0.190 to 0.662 | 34                                   | 5        | -0.001      | -0.255 to 0.253 |
| Participant 6-month QALY (DEMQOL-PROXY)                 | 60                                        | 5        | 0.004       | -0.121 to 0.129 | 67                                   | 6        | 0.037       | -0.125 to 0.198 |
| SI 6-month QALY (EQ-5D-5L)                              | 48                                        | 5        | 0.255       | -0.109 to 0.619 | 63                                   | 6        | -0.040      | -0.135 to 0.055 |

Note: HRE=health records extraction; SIR=Suitable Informant-reported; SIR+= hospital costs data from HRE used when these costs were missing from SIR dataset; SI=suitable informant; n=number of observations; N=number of clusters
