# Supplementary material for: PERFECTED enhanced recovery pathway (PERFECT-ER) versus standard acute hospital care for people after hip fracture surgery who have cognitive impairment: a feasibility cluster randomised controlled trial
Source: HighWire-hosted journal article supplement (doi:10.1136/bmjopen-2021-055267), 2022-02-01
Supplement: bmjopen-2021-055267supp009_data_supplement.pdf [file bmjopen-2021-055267supp009_data_supplement.pdf]

Supplementary Table 9. Agreement between hospital records-extracted and self-report hospital service use and costs.

| Item                  | Period | Mean<br>Difference (SD)<br>(HRE – SIR) | $\rho_c$ (95% CI)      | 95% limits of<br>agreement | Exact<br>(none)<br>% (N) | Exact<br>(some)<br>% (N) | Under<br>% (N) | Over<br>% (N) |
|-----------------------|--------|----------------------------------------|------------------------|----------------------------|--------------------------|--------------------------|----------------|---------------|
| <b>A&amp;E visits</b> | Time 0 | -0.339 (2.945)                         | 0.099 (0.061, 0.136)   | -6.110, 5.433              | 77 (198)                 | 9 (23)                   | 4 (10)         | 10 (26)       |
|                       | Time 1 | -0.015 (0.304)                         | 0.452 (0.343, 0.561)   | -0.611, 0.581              | 90 (186)                 | 3 (7)                    | 2 (5)          | 4 (8)         |
|                       | Time 2 | -0.124 (0.908)                         | 0.308 (0.218, 0.397)   | -1.903, 1.655              | 78 (132)                 | 8 (14)                   | 5 (8)          | 9 (15)        |
|                       | Time 3 | -0.143 (0.817)                         | 0.367 (0.249, 0.485)   | -1.744, 1.458              | 75 (95)                  | 15 (19)                  | 2 (2)          | 8 (10)        |
| <b>Admissions</b>     | Time 0 | 0.100 (0.630)                          | 0.620 (0.462, 0.777)   | -1.134, 1.334              | 38 (23)                  | 27 (16)                  | 22 (13)        | 13 (8)        |
|                       | Time 1 | 0.108 (0.350)                          | 0.454 (0.350, 0.557)   | -0.577, 0.794              | -                        | 90 (75)                  | 10 (8)         | -             |
|                       | Time 2 | 0.061 (0.493)                          | 0.617 (0.523, 0.711)   | -0.905, 1.028              | 69 (112)                 | 9 (14)                   | 14 (23)        | 9 (14)        |
|                       | Time 3 | 0.033 (0.284)                          | 0.813 (0.753, 0.873)   | -0.525, 0.590              | 83 (100)                 | 8 (10)                   | 6 (7)          | 3 (3)         |
| <b>Inpatient days</b> | Time 0 | 0.508 (5.513)                          | 0.449 (0.359, 0.540)   | -10.298, 11.313            | 84 (103)                 | 8 (10)                   | 6 (7)          | 2 (3)         |
|                       | Time 1 | 0.000 (8.028)                          | 0.544 (0.445, 0.643)   | -15.735, 15.735            | -                        | 41 (81)                  | 15 (29)        | 44 (86)       |
|                       | Time 2 | 1.093 (11.281)                         | 0.460 (0.342, 0.579)   | -21.017, 23.203            | 66 (107)                 | 2 (3)                    | 15 (24)        | 17 (27)       |
|                       | Time 3 | 1.293 (9.211)                          | 0.197 (0.082, 0.311)   | -16.759, 19.346            | 87 (100)                 | 1 (1)                    | 9 (10)         | 3 (4)         |
| <b>Day hospital</b>   | Time 0 | 0.031 (0.902)                          | 0.037 (-0.075, 0.149)  | -1.736, 1.799              | 94 (238)                 | -                        | 5 (12)         | 2 (4)         |
|                       | Time 1 | 0.025 (0.221)                          | -                      | -0.408, 0.457              | 99 (161)                 | -                        | 1 (2)          | -             |
|                       | Time 2 | 0.006 (0.132)                          | 0.724 (0.670, 0.777)   | -0.254, 0.265              | 98 (169)                 | -                        | 1 (2)          | 1 (1)         |
|                       | Time 3 | 0.056 (0.319)                          | 0.428 (0.369, 0.487)   | -0.569, 0.681              | 97 (121)                 | -                        | 3 (4)          | -             |
| <b>Outpatient</b>     | Time 0 | 0.008 (1.069)                          | 0.537 (0.448 to 0.625) | -2.087 to 2.103            | 67 (164)                 | 11 (28)                  | 11 (26)        | 11 (28)       |
|                       | Time 1 | -0.015 (0.272)                         | 0.417 (0.303 to 0.530) | -0.548 to 0.519            | 93 (188)                 | 3 (6)                    | 1 (3)          | 3 (6)         |
|                       | Time 2 | -0.047 (0.554)                         | 0.529 (0.420 to 0.637) | -1.134 to 1.039            | 77 (130)                 | 11 (18)                  | 4 (6)          | 9 (15)        |
|                       | Time 3 | 0.016 (0.589)                          | 0.764 (0.691 to 0.836) | -1.138 to 1.171            | 72 (88)                  | 10 (12)                  | 8 (10)         | 10 (12)       |
| <b>Hospital costs</b> | Time 0 | 177.437 (1654.363)                     | 0.660 (0.597 to 0.723) | -3 065 to 3 420            | 50 (130)                 | 5 (12)                   | 24 (62)        | 21 (55)       |
|                       | Time 1 | -420.340 (3 355.633)                   | 0.379 (0.262 to 0.496) | -6 997 to 6 157            | -                        | 27 (55)                  | 17 (34)        | 56 (112)      |
|                       | Time 2 | 1 336.827 (4 773.868)                  | 0.295 (0.182 to 0.409) | -8 020 to 10 693           | 45 (78)                  | 2 (3)                    | 33 (57)        | 21 (36)       |
|                       | Time 3 | 342.110 (3 151.993)                    | 0.261 (0.136 to 0.385) | -5 836 to 6 520            | 52 (66)                  | 3 (4)                    | 24 (31)        | 21 (27)       |

Notes: HRE=extraction from hospital records; SIR=Suitable Informant report; Time 0=3 months prior to baseline assessment; Time 1=1 month post-fracture; Time 2=2 months prior to 3 months post-fracture; Time 3=3 months prior to 6 months post-fracture;  $\rho_c$ =Lin's concordance correlation coefficient; Exact(none)=zero use/costs in both sources; Exact (some)=the same frequency or cost in both sources; Under=under-reporting (lower frequency/cost in SIR than HRE); Over=over-reporting (higher frequency/use in SIR than HRE).
